# Supplementary material
Source: ML conference proceedings conference paper supplement (https://openreview.net/forum?id=L3UfIfNxb7)

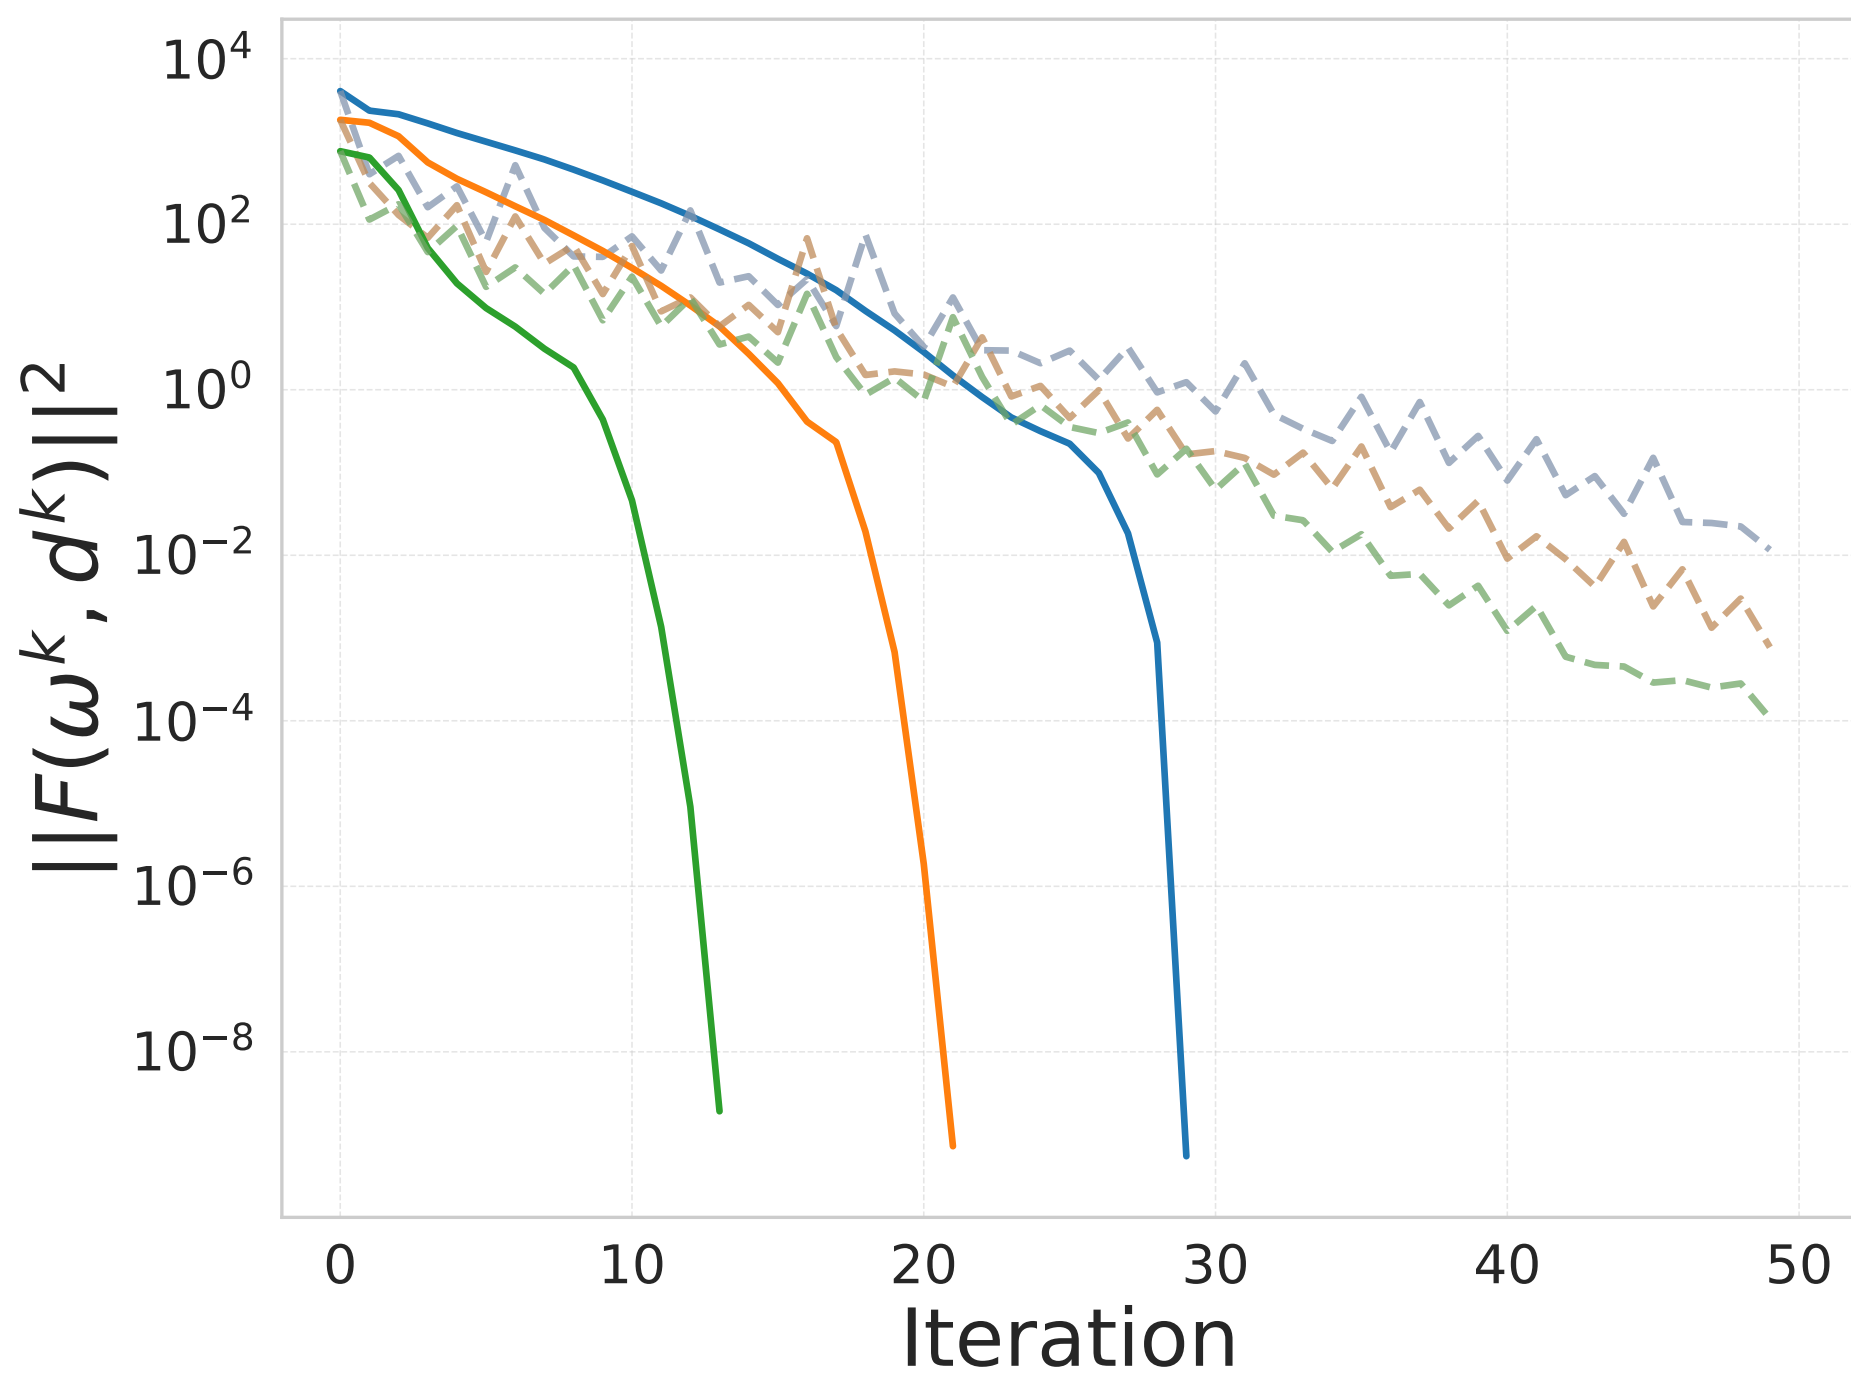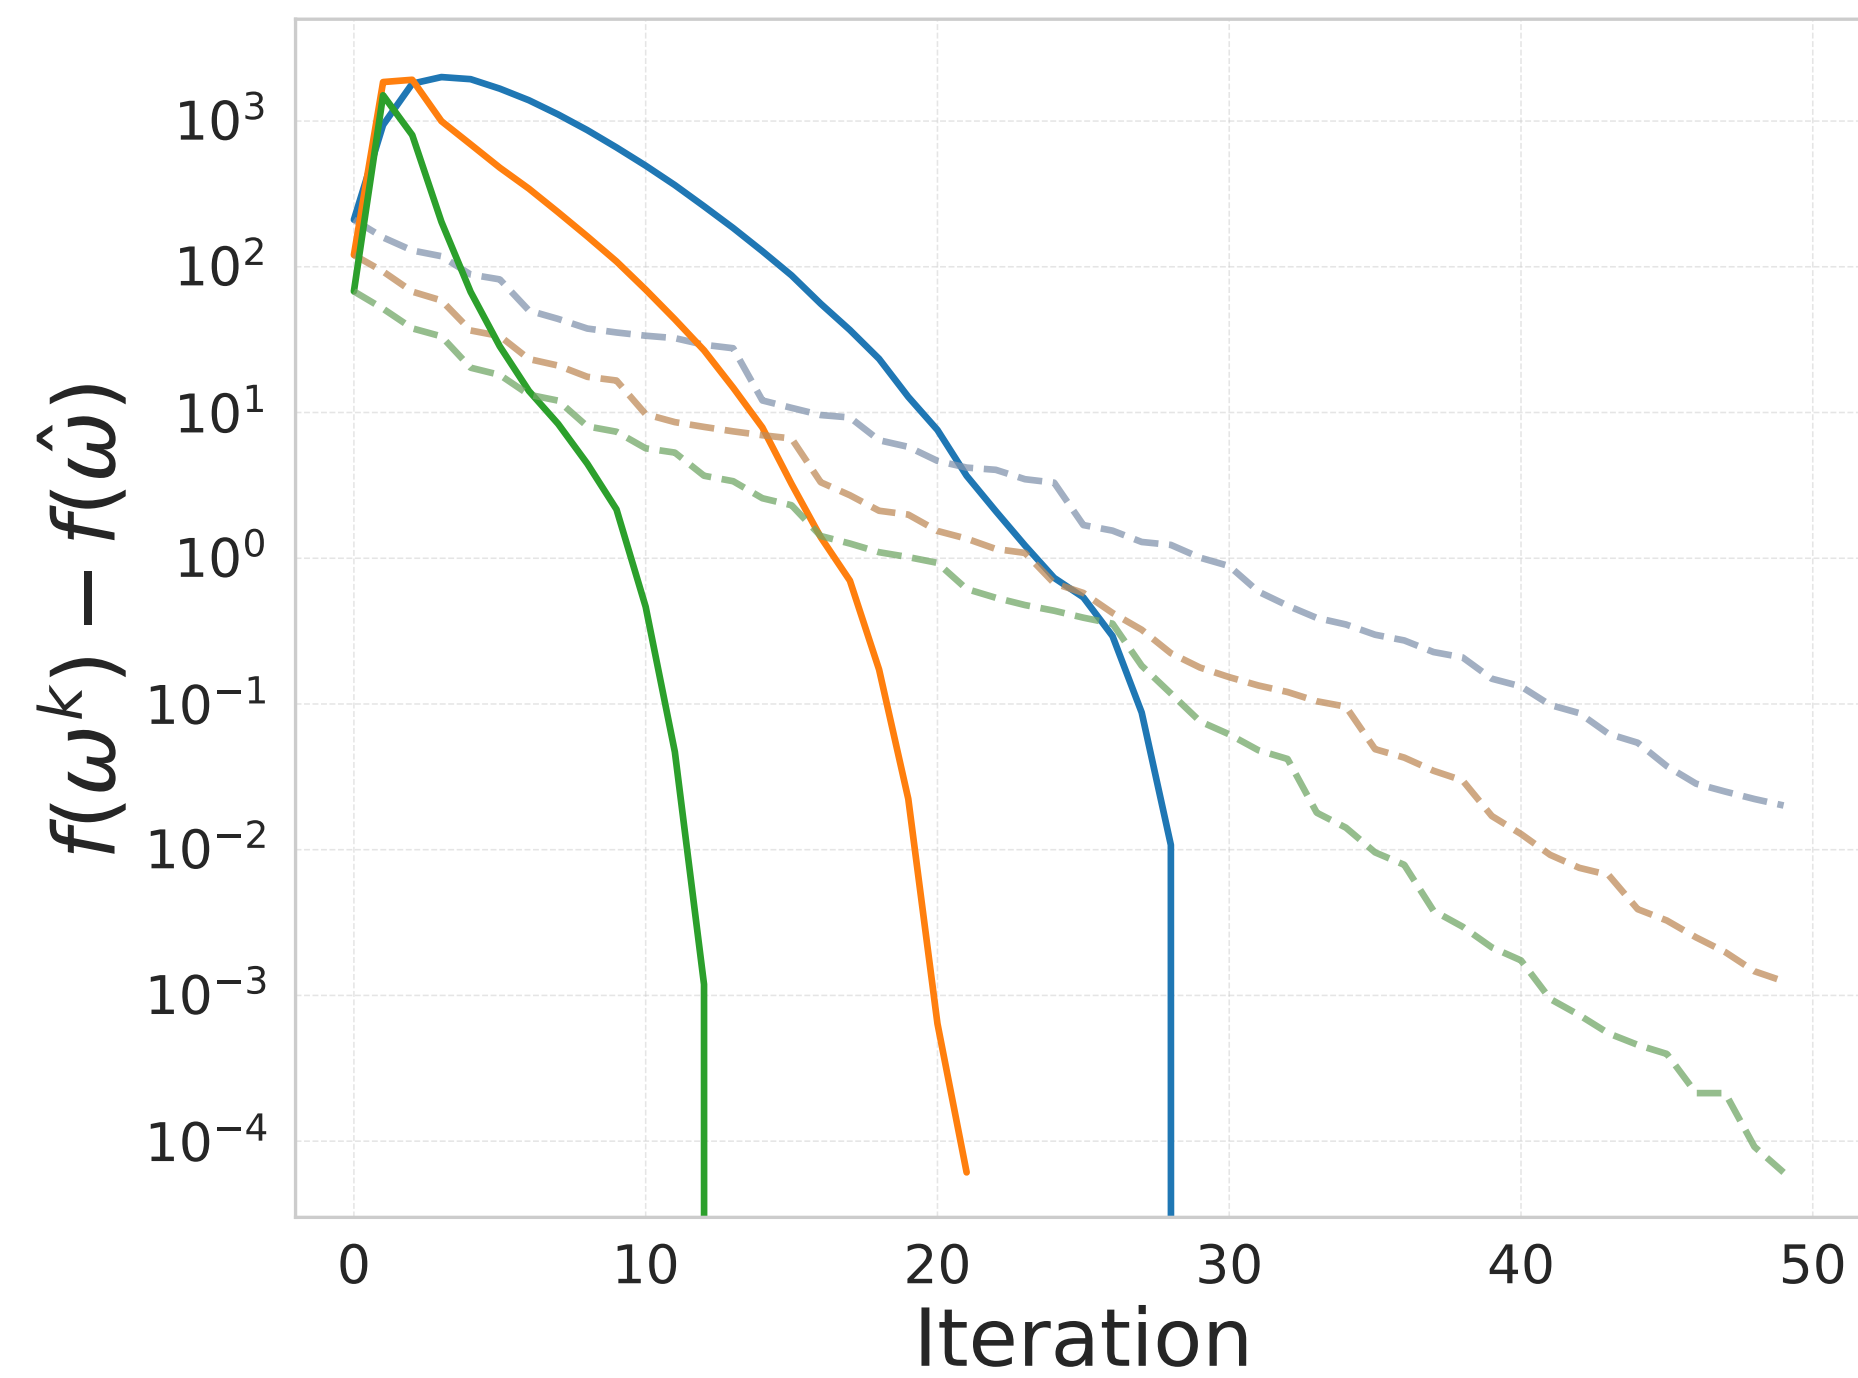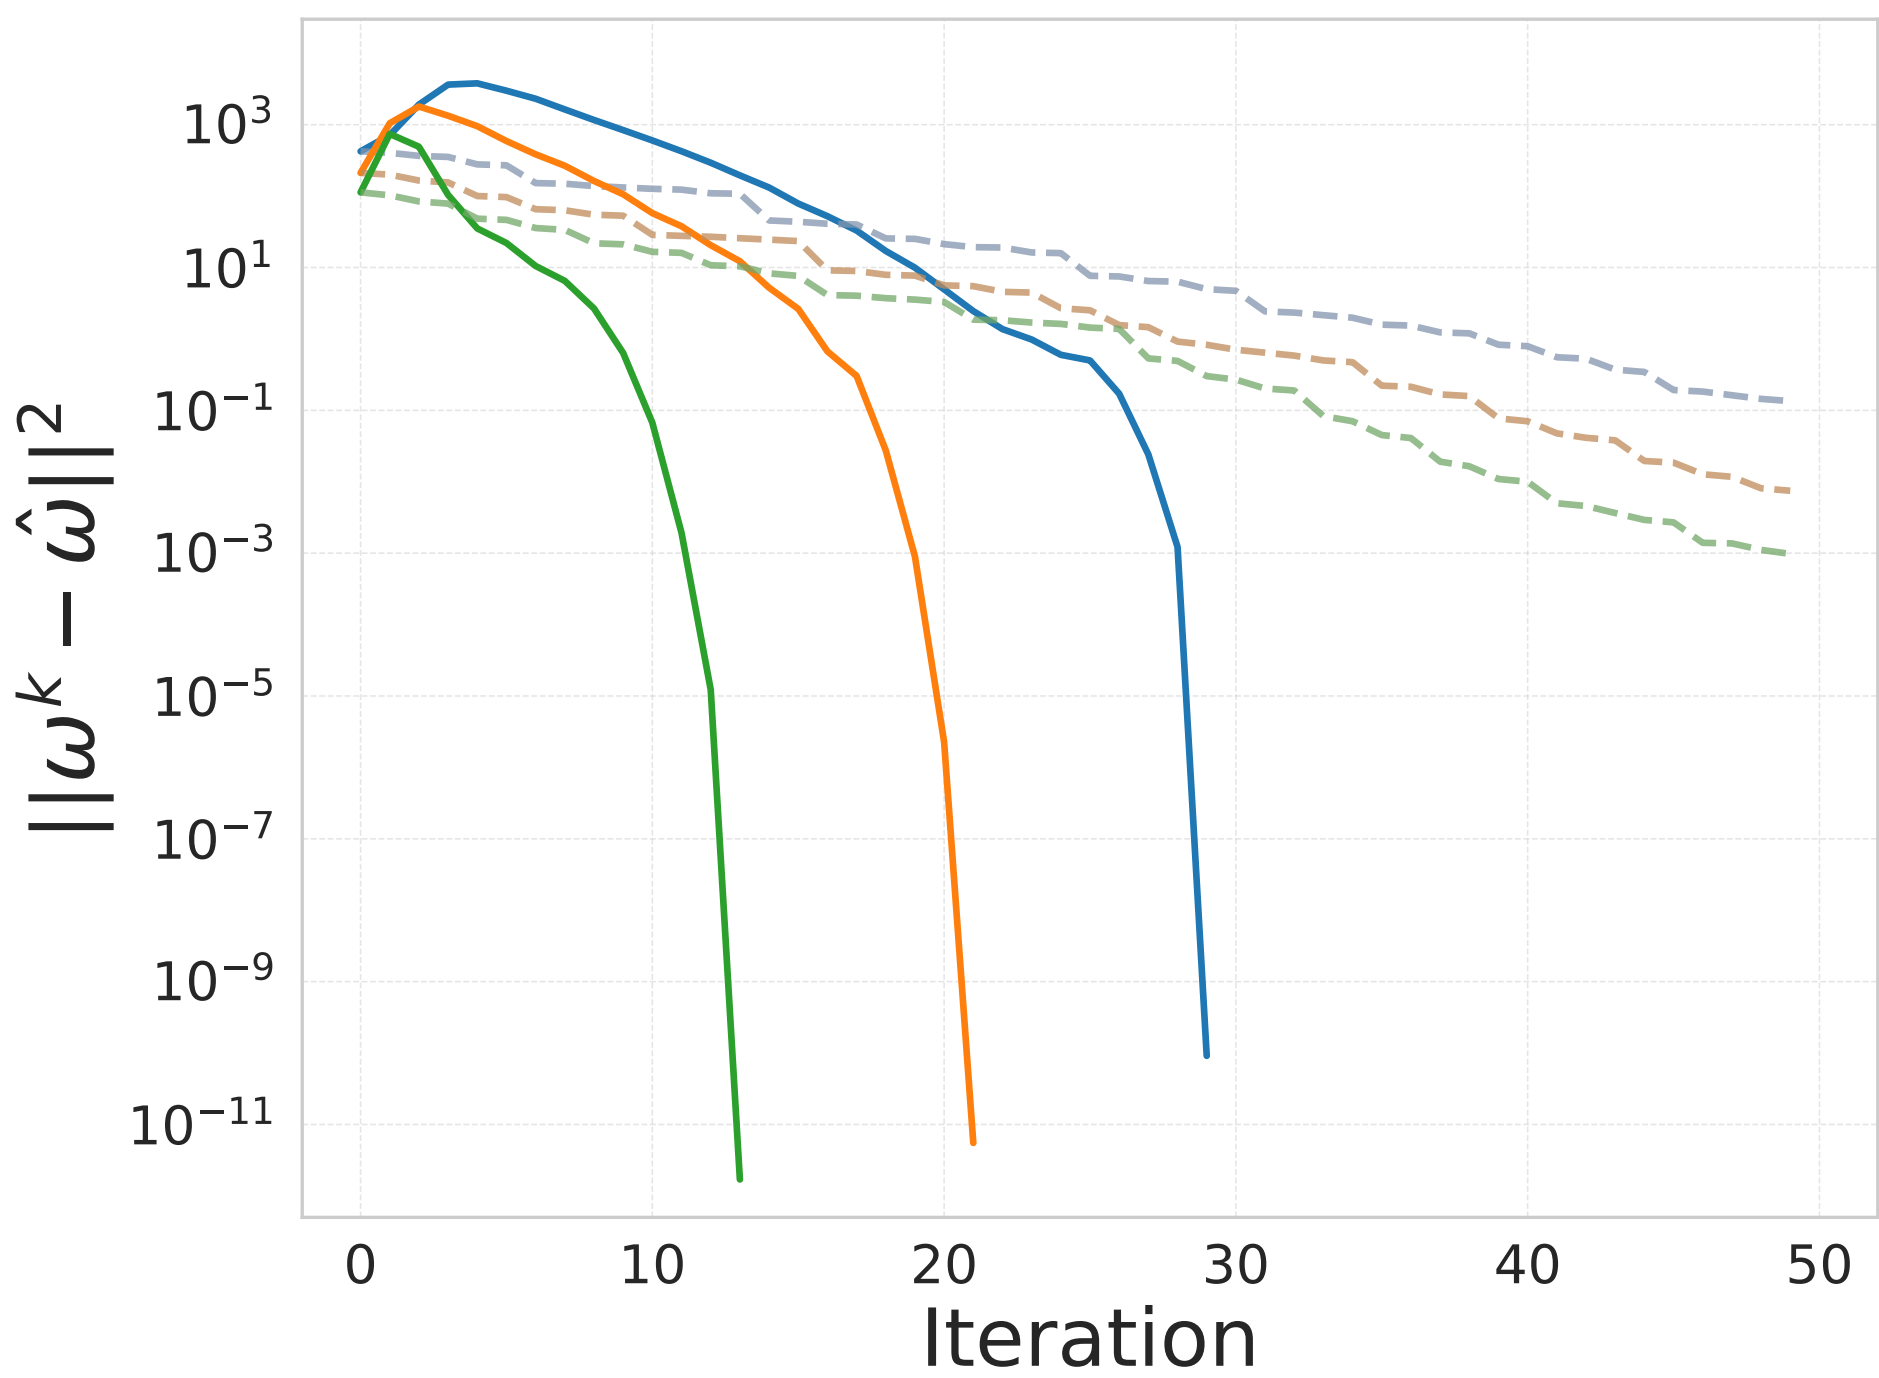

method — B-semi - - - - Prox

$\lambda$  — 0.1 - - - - 0.15 - - - - 0.2

Supplement: supplementary_material [file quadratic_conv.pdf › Supplementary_Material/quadratic_conv.pdf]
